# Supplementary material
Source: MDPI journal article supplement (https://www.mdpi.com/1424-8247/16/1/15)
Supplement: s1 [file s1]

**Supplementary Table S1. The primers used for quantitative RT–PCR**

| Gene symbols  | Sequence |                                  |
|---------------|----------|----------------------------------|
| <i>MYC</i>    | Forward  | 5'- TCCAGCTTGTACCTGCAGGATCTGA-3' |
|               | Reverse  | 5'- CCTCCAGCAGAAGGTGATCCAGACT-3' |
| <i>FASLG</i>  | Forward  | 5'- TTGGAGAAGCAAATAGGCCACC-3'    |
|               | Reverse  | 5'- AAGATTGAACACTGCCCCCA-3'      |
| <i>PEG3</i>   | Forward  | 5'- CTCACAACACAATCCAGGAC-3'      |
|               | Reverse  | 5'- TAGACCTCGACTGGTGCTTG-3'      |
| <i>FADD</i>   | Forward  | 5'- GCCATGGACCCGTTCTGG-3'        |
|               | Reverse  | 5'- CTCGATGCTGTCGATCTTG-3'       |
| <i>MCL1</i>   | Forward  | 5'- CTTCGGAACTGGACATCAA-3'       |
|               | Reverse  | 5'- GAAGAACTCCACAAACCCATC-3'     |
| <i>IL12A</i>  | Forward  | 5'- CACAAAGGAGGCGAGGTTCT-3'      |
|               | Reverse  | 5'- GGGTCAGGTTTGATGATGTCC-3'     |
| <i>CXCL10</i> | Forward  | 5'- AGCAGTTAGCAAGGAAAGGTCT-3'    |
|               | Reverse  | 5'- GGAGGATGGCAGTGGAAGTC-3'      |
| <i>HGF</i>    | Forward  | 5'- CAGCTTTTTGCCTTCGAGCTA-3'     |
|               | Reverse  | 5'- TCTCGTAGGTCCTTGCACTT-3'      |
| <i>AKT1</i>   | Forward  | 5'- AAGACGGGAGCAGGCGG-3'         |
|               | Reverse  | 5'- GGTCTTGATGTACTCCCCTCG-3'     |
| <i>ACTB</i>   | Forward  | 5'- GCTGTGCTATCCCTGTACGC-3'      |
|               | Reverse  | 5'- TGCCTCAGGGCAGCGGAACC-3'      |

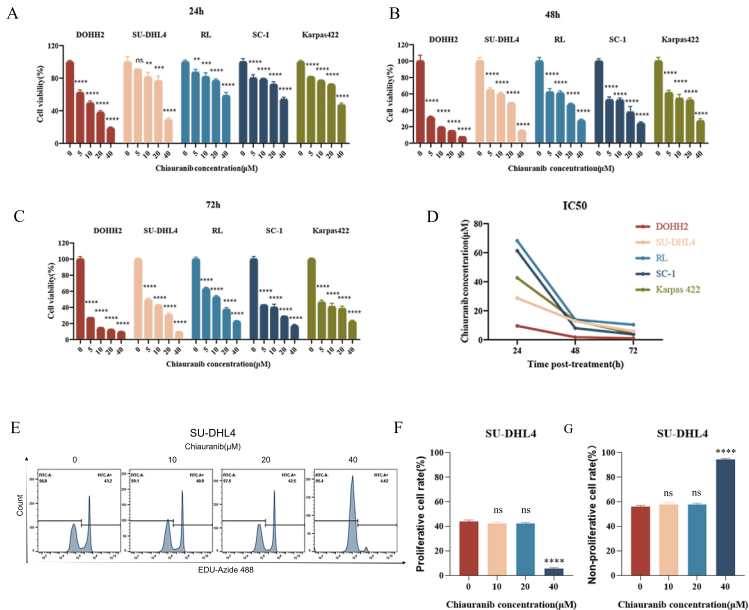

**Supplementary Figure S1**
